# Supplementary material for: Bilayer hydrogel with a protective film and a regenerative hydrogel for effective diabetic wound treatment
Source: Royal Society of Chemistry journal article supplement (doi:10.1039/d4bm00547c), 2024-01-01
Supplement: d4bm00547c1.pdf [file d4bm00547c1.pdf]

## Bilayer Hydrogel with Protective Film and Regenerative Hydrogel for Effective Diabetic Wounds Treatment

Jinfeng Zhang<sup>1†</sup>, Jing Li<sup>1†</sup>, Yang Zhang<sup>2</sup>, Yueshui Zhao<sup>1,3,4</sup>, Jing Shen<sup>1,3,4</sup>, Fukuan Du<sup>1,3,4</sup>, Yu Chen<sup>1,3,4</sup>, Mingxing Li<sup>1,3,4</sup>, Xu Wu<sup>1,3,4</sup>, Meijuan Chen<sup>1,3,4</sup>, Zhangang Xiao<sup>1,3,4\*</sup>, Shuai Deng<sup>1,3,4\*</sup>

### Supplementary Figures

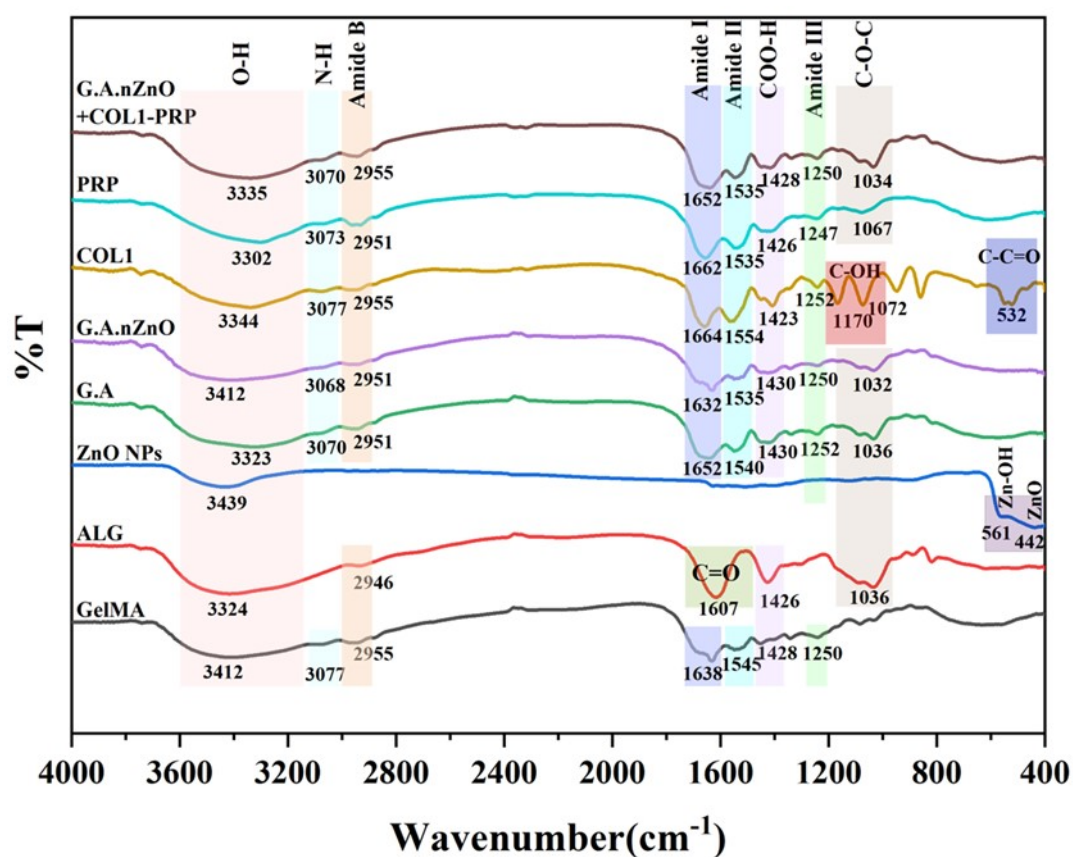

**Supplementary Figure 1.** FT-IR spectra of various components and hydrogels. Spectra include G.A.nZnO + COL1-PRP, PRP, COL1, G.A.nZnO, G.A, ZnO NPs, ALG, and GelMA. The identified peaks correspond to different functional groups such as O-H, N-H, Amide I, Amide II, Amide III, COO-H, C=O, C-O-C, and Zn-OH. The specific wavelengths at which these peaks occur are highlighted.

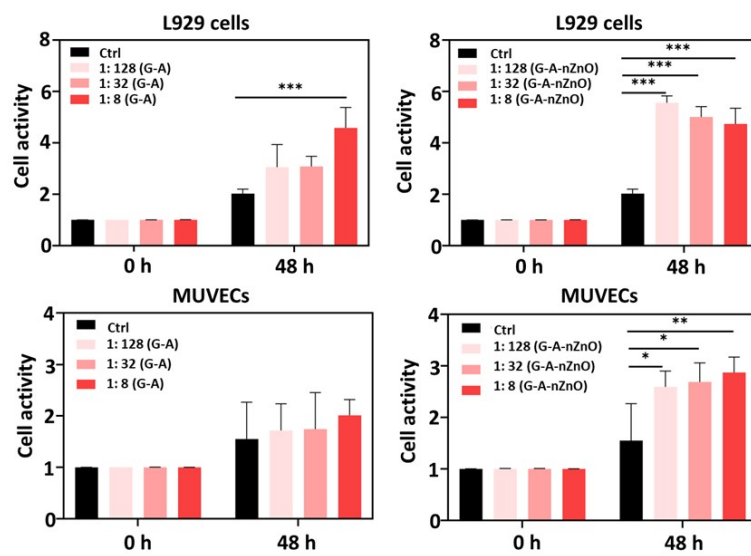

**Supplementary Figure 2.** CCK-8 assay of L929 cells and MUEVCs on Day 0, Day 1 and Day 3 after treatment with the extract liquid of GelMA-ALG film and GelMA-ALG-nano ZnO film at dilution ratios of 1:8, 1:32, and 1:128 at 0 h and 48 h. ( $n = 3$ ; \* indicates  $p < 0.05$ , \*\* indicates  $p < 0.01$ , relative to Ctrl group.)

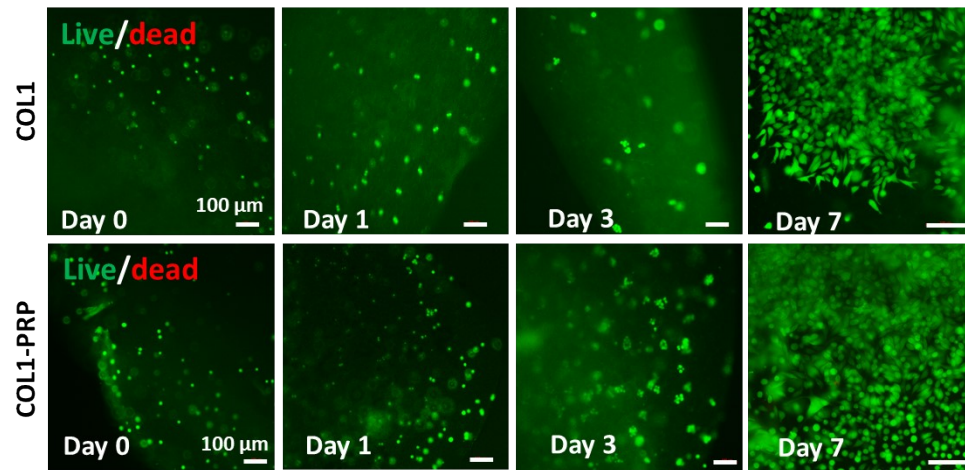

**Supplementary Figure 3.** Live-dead images show the viability of L929 cells cultured in 3D COL1 hydrogel and COL1-PRP hydrogel.

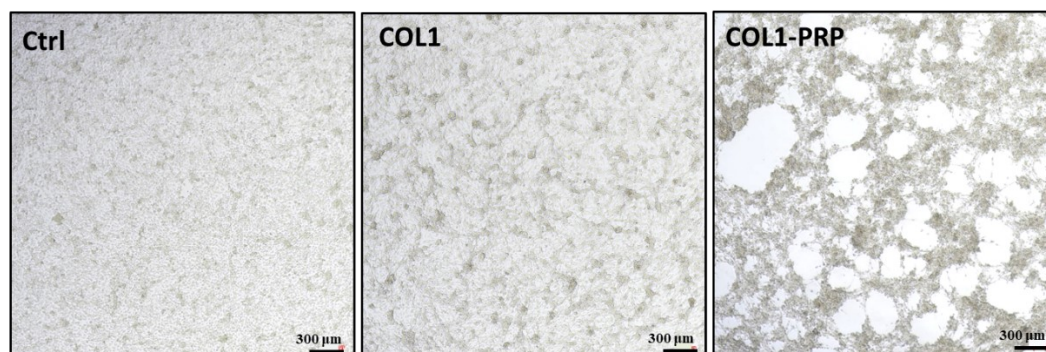

**Supplementary Figure 4.** Tube formation of MUVECs in medium containing COL1-PRP hydrogel extract liquid in culture plate without Matrigel coating.

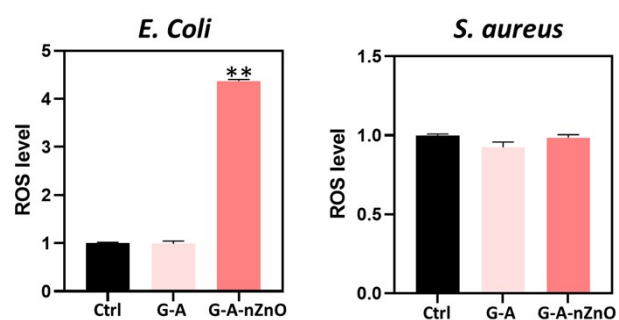

**Supplementary Figure 5.** Reactive oxygen species (ROS) levels in *E. coli* and *S. aureus* after treatment with Ctrl, G-A hydrogel, and G-A-nZnO hydrogel. ( $n = 3$ ; \* indicates  $p < 0.05$ , \*\* indicates  $p < 0.01$ , relative to Ctrl group.)

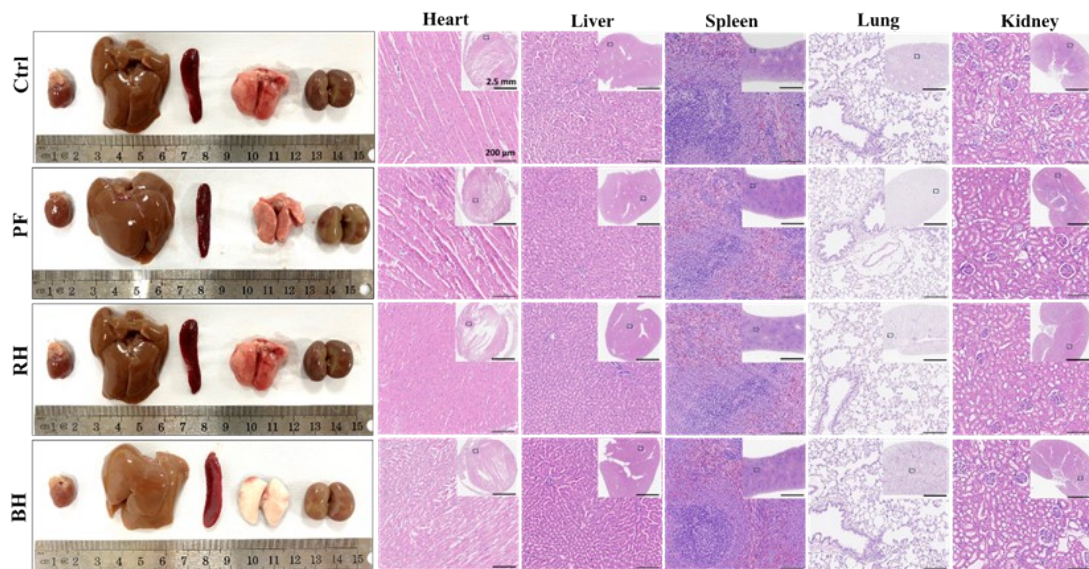

**Supplementary Figure 6.** *In vivo* toxicity of ZnO nanoparticles. Morphology and H&E staining of heart, liver, spleen, lung, and kidney tissues in diabetic rats after treatment with protective film, regenerative hydrogel, bilayer hydrogel, and the control group.
